# Supplementary material for: Multielement analysis of plant extracts with potential use in the treatment of peptic ulcers by synchrotron radiation total reflection X-ray fluorescence
Source: PeerJ. 2018 Sep 12;6:e5375. doi: 10.7717/peerj.5375 (PMC6139012; doi:10.7717/peerj.5375)
Supplement: Table S1 [file peerj-06-5375-s001.xlsx]

## Sheet: Plan1
Files	Z=15	sigma	Ri	sigma*5	Sri	sigma*5/Sri	Ci	Z=16		Ri		Sri		Ci	Z=17		Ri		Sri		Ci	Z=19		Ri		Sri		Ci	Z=20		Ri		Sri		Ci	Z=22		Ri		Sri		Ci	Z=24		Ri		Sri		Ci
FIT0001.ASR	0.01092	0.0009355	0.0546	0.0046775	2.1e-06	2227.38	26000	0.03283	0.001189	0.16415	0.005945	6.62e-05	89.8036	2479.61	1.126	0.006551	5.63	0.032755	0.0007716	42.4508	7296.53	0.3784	0.003221	1.892	0.016105	0.0141941	1.13463	133.295	0.1247	0.002135	0.6235	0.010675	0.032158	0.331955	19.3886	0	0	0	0	0.0875172	0	0	0.006803	0.000509	0.034015	0.002545	0.170653	0.0149133	0.199323
FIT0002.ASR	0.01838	0.001253	0.0919	0.006265	2.1e-06	2983.33	43761.9	0.04951	0.00158	0.24755	0.0079	6.62e-05	119.335	3739.43	1.84	0.01062	9.2	0.0531	0.0007716	68.818	11923.3	0.5928	0.004688	2.964	0.02344	0.0141941	1.65139	208.819	0.1693	0.002794	0.8465	0.01397	0.032158	0.434418	26.3232	0.002285	0.0006836	0.011425	0.003418	0.0875172	0.0390552	0.130546	0.007128	0.0006259	0.03564	0.0031295	0.170653	0.0183384	0.208845
FIT0003.ASR	0.01136	0.0009639	0.0568	0.0048195	2.1e-06	2295	27047.6	0.03759	0.001249	0.18795	0.006245	6.62e-05	94.3353	2839.12	1.284	0.007378	6.42	0.03689	0.0007716	47.8097	8320.37	0.41	0.003449	2.05	0.017245	0.0141941	1.21494	144.426	0.1144	0.002123	0.572	0.010615	0.032158	0.330089	17.7872	0	0	0	0	0.0875172	0	0	0.006686	0.0005165	0.03343	0.0025825	0.170653	0.0151331	0.195895
FIT0004.ASR	0.007336	0.0009896	0.03668	0.004948	2.143e-06	2308.91	17116.2	0.02019	0.001207	0.10095	0.006035	6.618e-05	91.1907	1525.39	0.8532	0.005501	4.266	0.027505	0.0007716	35.6467	5528.77	1.958	0.01066	9.79	0.0533	0.0141941	3.75508	689.723	0.3073	0.003651	1.5365	0.018255	0.032158	0.567666	47.7797	0.003709	0.0007255	0.018545	0.0036275	0.0875172	0.041449	0.211901	0.006495	0.0006271	0.032475	0.0031355	0.170653	0.0183736	0.190299
FIT0005.ASR	0.02801	0.002689	0.14005	0.013445	2.143e-06	6273.92	65352.3	0.05572	0.003216	0.2786	0.01608	6.618e-05	242.974	4209.73	1.996	0.01899	9.98	0.09495	0.0007716	123.056	12934.2	5.087	0.04376	25.435	0.2188	0.0141941	15.4149	1791.94	0.6693	0.01011	3.3465	0.05055	0.032158	1.57193	104.064	0	0	0	0	0.0875172	0	0	0.01133	0.00152	0.05665	0.0076	0.170653	0.0445349	0.331961
FIT0006.ASR	0.02315	0.001868	0.11575	0.00934	2.143e-06	4358.38	54013.1	0.04522	0.002221	0.2261	0.011105	6.618e-05	167.8	3416.44	1.549	0.01196	7.745	0.0598	0.0007716	77.5013	10037.6	4.06	0.0276	20.3	0.138	0.0141941	9.72235	1430.17	0.4592	0.006482	2.296	0.03241	0.032158	1.00784	71.3975	0	0	0	0	0.0875172	0	0	0.007573	0.001242	0.037865	0.00621	0.170653	0.0363897	0.221883
FIT0007.ASR	0.05571	0.002441	0.27855	0.012205	2.143e-06	5695.29	129981	0.125	0.003107	0.625	0.015535	6.618e-05	234.739	9443.94	3.644	0.02422	18.22	0.1211	0.0007716	156.947	23613.3	0.7145	0.006839	3.5725	0.034195	0.0141941	2.4091	251.689	1.169	0.01007	5.845	0.05035	0.032158	1.56571	181.759	0.01591	0.001436	0.07955	0.00718	0.0875172	0.082041	0.908964	0.008181	0.001016	0.040905	0.00508	0.170653	0.029768	0.239697
FIT0008.ASR	0.05967	0.002466	0.29835	0.01233	2.143e-06	5753.62	139221	0.1253	0.003103	0.6265	0.015515	6.618e-05	234.436	9466.61	3.675	0.02439	18.375	0.12195	0.0007716	158.048	23814.2	0.7144	0.006849	3.572	0.034245	0.0141941	2.41262	251.654	1.175	0.01016	5.875	0.0508	0.032158	1.5797	182.692	0.01569	0.001449	0.07845	0.007245	0.0875172	0.0827837	0.896395	0.006175	0.0009947	0.030875	0.0049735	0.170653	0.029144	0.180923
FIT0009.ASR	0.06017	0.002457	0.30085	0.012285	2.143e-06	5732.62	140387	0.1262	0.003094	0.631	0.01547	6.618e-05	233.756	9534.6	3.667	0.02436	18.335	0.1218	0.0007716	157.854	23762.3	0.7161	0.006843	3.5805	0.034215	0.0141941	2.41051	252.253	1.182	0.01017	5.91	0.05085	0.032158	1.58126	183.78	0.01828	0.001475	0.0914	0.007375	0.0875172	0.0842691	1.04437	0.009544	0.001052	0.04772	0.00526	0.170653	0.0308228	0.279632
[truncated: 56 more columns]
